# Supplementary material for: An unprecedented μ4-Sn2Se9 ligand: solvothermal syntheses and characterizations of novel lanthanum selenidostannates [{La(dien)2}4(μ4-Sn2Se9)(μ-Sn2Se6)]∞ and [La2(en)8(μ-Se2)]Sn2Se6
Source: Royal Society of Chemistry journal article supplement (doi:10.1039/b914603b), 2009-01-01
Supplement: b914603b.pdf [file b914603b.pdf]

## Electronic Supplementary Information

### An unprecedented $\mu_4$ - $\text{Sn}_2\text{Se}_9$ ligand: Solvothermal syntheses and Characterizations of novel lanthanum selenidostannates $[\{\text{La}(\text{dien})_2\}_4(\mu_4\text{-Sn}_2\text{Se}_9)(\mu\text{-Sn}_2\text{Se}_6)]_\infty$ and $[\text{La}_2(\text{en})_8(\mu\text{-Se}_2)]\text{Sn}_2\text{Se}_6$

Jiang-Fang Chen, Qin-Yan Jin, Ying-Li Pan, Yong Zhang, Ding-Xian Jia\*

College of Chemistry, Chemical Engineering and Materials Science, Soochow University, Suzhou 215123, People's Republic of China.

E-mail: [jiadingxian@suda.edu.cn](mailto:jiadingxian@suda.edu.cn)

#### 1. Synthesis of $[\{\text{La}(\text{dien})_2\}_4(\mu_4\text{-Sn}_2\text{Se}_9)(\mu\text{-Sn}_2\text{Se}_6)]$ (**1**)

A mixture of  $\text{La}_2\text{O}_3$  (82 mg, 0.25 mmol), Sn (59 mg, 0.50 mmol), and Se (158 mg, 2 mmol) and 3 mL dien was loaded into a Teflon-lined stainless steel autoclave with an inner volume of 10 mL. The sealed autoclave was heated under autogenous pressure at 165 °C for 4 days. Upon cooling to room temperature, red block crystals of **1** were obtained by filtering and washing with ethanol (68% yield based on Sn). The crystals are stable in dried air and ethanol. Elem anal. Calcd for  $\text{C}_{32}\text{H}_{104}\text{N}_{24}\text{Se}_{15}\text{La}_4\text{Sn}_4$ : C, 12.64; H, 3.45; N, 11.06. Found: C, 12.48; H, 3.52; N, 10.92. IR (KBr,  $\text{cm}^{-1}$ ): 3927 (w), 3896 (w), 3868 (w), 3832 (w), 3739 (s), 3675 (w), 3617 (w), 3559 (w), 2359 (vs), 2339 (s), 1798 (w), 1740 (w), 1696 (w), 1650 (w), 1521 (s), 1457 (w), 1428 (w), 1003 (w), 937 (w), 799 (w), 667 (w), 539 (w), 439 (w), 440 (w).

#### 2. Synthesis of $[\text{La}_2(\text{en})_8(\mu\text{-Se}_2)]\text{Sn}_2\text{Se}_6$ (**2**)

A mixture of  $\text{La}_2\text{O}_3$  (82 mg, 0.25 mmol), Sn (59 mg, 0.50 mmol), and Se (158 mg, 2 mmol) and 3 mL en was loaded into a Teflon-lined stainless steel autoclave with an inner volume of 10 mL. The sealed autoclave was heated under autogenous pressure at 165 °C for 4 days. Upon cooling to room temperature, yellow block crystals of **2** were obtained by filtering and washing with ethanol (61% yield based on Sn). The crystals are stable in dried air and ethanol. Elem anal. Calcd for

C<sub>16</sub>H<sub>64</sub>N<sub>16</sub>Se<sub>8</sub>La<sub>2</sub>Sn<sub>2</sub>: C, 11.81; H, 3.96; N, 13.77. Found: C, 11.67; H, 3.91; N, 13.61. IR (KBr, cm<sup>-1</sup>): 3731 (w), 3486 (w), 3286 (w), 2945 (w), 2884 (w), 2360 (s), 2324 (s), 1650 (w), 1595 (s), 1508 (w), 1467 (s), 1330 (w), 1275 (w), 1160 (s), 1023 (vs), 667 (s), 519 (s), 424 (w).

### 3. X-ray structure determination

The intensity data were collected on a Rigaku Mercury CCD diffractometer at 293(2) K using graphite-monochromated Mo-K $\alpha$  radiation ( $\lambda = 0.71073 \text{ \AA}$ ) with a  $\omega$ -scan method to a maximum  $2\theta$  value of 50.00°. A red 0.30 × 0.18 × 0.10 mm<sup>3</sup> block crystal of **1** and a yellow 0.20 × 0.20 × 0.18 mm<sup>3</sup> block crystal of **2** were used for data collection. An absorption correction was applied for all the compounds using multi-scan method. The structures were solved with direct methods using the SHELXS-97 program<sup>[1]</sup> and refinement was performed against  $F^2$  using the SHELXL-97 program.<sup>[2]</sup> All the non-hydrogen atoms were refined anisotropically. The hydrogen atoms were positioned with idealised geometry and refined with fixed isotropic displacement parameters using a riding model.

#### References

- [1] G. M. Sheldrick, SHELXS-97, Program for structure solution, Universität of Göttingen, Germany, 1997.  
 [2] G. M. Sheldrick, SHELXL-97, Program for structure refinement, Universität of Göttingen, Germany, 1997.

**Table S1.** Selected bond lengths / $\text{\AA}$  and angles / $^\circ$  for **1**

|                     |            |                                |            |
|---------------------|------------|--------------------------------|------------|
| Sn(1)–Se(1)         | 2.4892(17) | Sn(1)–Se(2)                    | 2.4450(18) |
| Sn(1)–Se(3)         | 2.5571(17) | Sn(1)–Se(3)#1                  | 2.6127(19) |
| Sn(2)–Se(4)         | 2.4828(18) | Sn(2)–Se(5)                    | 2.4825(17) |
| Sn(2)–Se(6)         | 2.5173(17) | Sn(2)–Se(7)#2                  | 2.5606(17) |
| La(1)–Se(1)         | 3.4016(17) | La(1)–Se(4)                    | 3.2126(17) |
| La(1)–Se(5)         | 3.2884(17) | La(2)–Se(6)                    | 3.1166(16) |
| La(2)–Se(7)         | 3.2214(16) | La(2)–Se(8)                    | 2.9955(9)  |
| Se(7)–Se(8)#2       | 2.6860(16) |                                |            |
| La(1)–N(1)          | 2.670(12)  | La(1)–N(2)                     | 2.696(12)  |
| La(1)–N(3)          | 2.669(12)  | La(1)–N(4)                     | 2.690(11)  |
| La(1)–N(5)          | 2.667(11)  | La(1)–N(6)                     | 2.672(11)  |
| La(2)–N(7)          | 2.703(11)  | La(2)–N(8)                     | 2.725(11)  |
| La(2)–N(9)          | 2.727(12)  | La(2)–N(10)                    | 2.754(13)  |
| La(2)–N(11)         | 2.716(11)  | La(2)–N(12)                    | 2.623(11)  |
| Se(1)–Sn(1)–Se(2)   | 116.62(6)  | Se(3)–Sn(1)–Se(3) <sup>a</sup> | 93.70(6)   |
| Se(1)–Sn(1)–Se(3)   | 112.10(6)  | Se(2)–Sn(1)–Se(3)              | 112.42(7)  |
| Se(2)–Sn(1)–Se(3)#1 | 109.23(7)  | Se(1)–Sn(1)–Se(3)#1            | 110.39(7)  |
| Se(4)–Sn(2)–Se(5)   | 106.02(6)  | Se(4)–Sn(2)–Se(6)              | 111.32(6)  |
| Se(4)–Sn(2)–Se(7)#2 | 104.99(6)  | Se(5)–Sn(2)–Se(6)              | 108.46(6)  |

|                       |           |                     |           |
|-----------------------|-----------|---------------------|-----------|
| Se(5)–Sn(2)–Se(7)#2   | 117.91(6) | Se(6)–Sn(2)–Se(7)#2 | 108.10(6) |
| Sn(1)–Se(1)–La(1)     | 111.56(5) | Sn(1)–Se(3)–Sn(1)#1 | 86.30(6)  |
| Sn(2)–Se(4)–La(1)     | 87.24(5)  | Sn(2)–Se(5)–La(1)   | 85.57(5)  |
| Sn(2)–Se(6)–La(2)     | 106.23(5) | Sn(2)#2–Se(7)–La(2) | 121.60(6) |
| Se(7)#2–Se(8)–La(2)#2 | 68.83(3)  | Se(7)#2–Se(8)–La(2) | 111.17(3) |
| La(8)–Se(8)–La(2)#2   | 180.00(4) | Se(1)–La(1)–Se(4)   | 136.61(4) |
| Se(1)–La(1)–Se(5)     | 143.19(5) | Se(4)–La(1)–Se(5)   | 75.18(4)  |
| Se(1)–La(1)–N(1)      | 72.4(3)   | Se(1)–La(1)–N(2)    | 75.1(3)   |
| Se(1)–La(1)–N(3)      | 128.4(3)  | Se(1)–La(1)–N(4)    | 71.3(3)   |
| Se(1)–La(1)–N(5)      | 68.0(2)   | Se(1)–La(1)–N(6)    | 86.9(2)   |
| Se(4)–La(1)–N(1)      | 64.7(3)   | Se(4)–La(1)–N(2)    | 91.9(3)   |
| Se(4)–La(1)–N(3)      | 77.1(3)   | Se(4)–La(1)–N(4)    | 148.1(3)  |
| Se(4)–La(1)–N(5)      | 132.8(2)  | Se(4)–La(1)–N(6)    | 77.0(2)   |
| Se(5)–La(1)–N(1)      | 137.7(3)  | Se(5)–La(1)–N(2)    | 131.0(3)  |
| Se(5)–La(1)–N(3)      | 66.8(3)   | Se(5)–La(1)–N(4)    | 86.8(3)   |
| Se(5)–La(1)–N(5)      | 76.0(2)   | Se(5)–La(1)–N(6)    | 83.6(2)   |
| N(1)–La(1)–N(2)       | 65.5(4)   | N(1)–La(1)–N(3)     | 113.9(4)  |
| N(1)–La(1)–N(4)       | 135.0(4)  | N(1)–La(1)–N(5)     | 122.8(4)  |
| N(1)–La(1)–N(6)       | 75.3(4)   | N(2)–La(1)–N(3)     | 64.2(4)   |
| N(2)–La(1)–N(4)       | 80.2(4)   | N(2)–La(1)–N(5)     | 134.9(4)  |
| N(2)–La(1)–N(6)       | 140.1(4)  | N(3)–La(1)–N(4)     | 71.7(4)   |
| N(3)–La(1)–N(5)       | 122.9(4)  | N(3)–La(1)–N(6)     | 144.6(4)  |
| N(4)–La(1)–N(5)       | 64.3(4)   | N(4)–La(1)–N(6)     | 127.4(4)  |
| N(5)–La(1)–N(6)       | 63.2(3)   | Se(6)–La(2)–Se(7)   | 130.79(5) |
| Se(7)–La(2)–Se(8)     | 51.04(3)  | Se(6)–La(2)–Se(8)   | 87.40(4)  |
| Se(6)–La(2)–N(7)      | 77.4(3)   | Se(6)–La(2)–N(8)    | 75.7(3)   |
| Se(6)–La(2)–N(9)      | 78.6(3)   | Se(6)–La(2)–N(10)   | 147.9(3)  |
| Se(6)–La(2)–N(11)     | 132.6(3)  | Se(6)–La(2)–N(12)   | 70.3(2)   |
| Se(7)–La(2)–N(7)      | 67.7(2)   | Se(7)–La(2)–N(8)    | 114.8(3)  |
| Se(7)–La(2)–N(9)      | 150.5(3)  | Se(7)–La(2)–N(10)   | 73.6(3)   |
| Se(7)–La(2)–N(11)     | 79.6(2)   | Se(7)–La(2)–N(12)   | 112.2(2)  |
| Se(8)–La(2)–N(7)      | 74.4(3)   | Se(8)–La(2)–N(8)    | 136.9(3)  |
| Se(8)–La(2)–N(9)      | 150.7(3)  | Se(8)–La(2)–N(10)   | 122.9(3)  |
| Se(8)–La(2)–N(11)     | 90.6(2)   | Se(8)–La(2)–N(12)   | 73.4(2)   |
| N(7)–La(2)–N(8)       | 63.4(4)   | N(7)–La(2)–N(9)     | 126.0(4)  |
| N(7)–La(2)–N(10)      | 99.1(4)   | N(7)–La(2)–N(11)    | 146.6(3)  |
| N(7)–La(2)–N(12)      | 134.8(4)  | N(8)–La(2)–N(9)     | 64.0(4)   |
| N(8)–La(2)–N(10)      | 74.4(4)   | N(8)–La(2)–N(11)    | 129.8(4)  |
| N(8)–La(2)–N(12)      | 132.8(3)  | N(9)–La(2)–N(10)    | 78.1(4)   |
| N(9)–La(2)–N(11)      | 80.6(3)   | N(9)–La(2)–N(12)    | 77.7(4)   |
| N(10)–La(2)–N(11)     | 63.9(4)   | N(10)–La(2)–N(12)   | 124.9(4)  |
| N(11)–La(2)–N(12)     | 63.8(3)   |                     |           |

Symmetry transformations used to generate equivalent atoms: #1)  $-x, -y+1, -z+1$ , #2)  $-x+2, -y,$

-Z.

**Table S2.** Selected bond lengths /Å and angles /° for **2**

|                       |           |                                |           |
|-----------------------|-----------|--------------------------------|-----------|
| Sn(1)–Se(2)           | 2.452(2)  | Sn(1)–Se(3)                    | 2.463(2)  |
| Sn(1)–Se(4)           | 2.594(2)  | Sn(1)–Se(4)#1                  | 2.590(2)  |
| La(1)–Se(1)           | 3.143(2)  | La(1)–Se(1)#2                  | 3.140(2)  |
| Se(1)–Se(1)#2         | 2.385(4)  |                                |           |
| La(1)–N(1)            | 2.732(16) | La(1)–N(2)                     | 2.749(16) |
| La(1)–N(3)            | 2.735(15) | La(1)–N(4)                     | 2.707(17) |
| La(1)–N(5)            | 2.702(17) | La(1)–N(6)                     | 2.866(18) |
| La(1)–N(7)            | 2.737(15) | La(1)–N(8)                     | 2.759(16) |
| Se(2)–Sn(1)–Se(3)     | 112.53(9) | Se(4)–Sn(1)–Se(4) <sup>a</sup> | 92.71(7)  |
| Se(2)–Sn(1)–Se(4)     | 115.23(9) | Se(3)–Sn(1)–Se(4)              | 109.51(9) |
| Se(3)–Sn(1)–Se(4)#1   | 112.75(9) | Se(2)–Sn(1)–Se(4)#1            | 112.65(9) |
| Sn(1)–Se(4)–Sn(1) #1  | 87.29(7)  | La(1)–Se(1)–La(1)#2            | 67.76(9)  |
| Se(1)#2–Se(1)–La(1)#2 | 67.62(9)  | Se(1)#2–Se(1)–La(1)            | 135.39(7) |
| Se(1)–La(1)–Se(1)#2   | 44.61(7)  | Se(1)–La(1)–N(1)               | 76.9(4)   |
| Se(1)–La(1)–N(2)      | 73.3(3)   | Se(1)–La(1)–N(3)               | 141.4(3)  |
| Se(1)–La(1)–N(4)      | 144.0(4)  | Se(1)–La(1)–N(5)               | 123.7(5)  |
| Se(1)–La(1)–N(6)      | 108.1(4)  | Se(1)–La(1)–N(7)               | 71.6(4)   |
| Se(1)–La(1)–N(8)      | 81.0(4)   | Se(1)#2–La(1)–N(1)             | 75.5(4)   |
| Se(1)#2–La(1)–N(2)    | 111.5(3)  | Se(1)#2–La(1)–N(3)             | 148.1(4)  |
| Se(1)#2–La(1)–N(4)    | 136.9(4)  | Se(1)#2–La(1)–N(5)             | 84.6(4)   |
| Se(1)#2–La(1)–N(6)    | 69.9(4)   | Se(1)#2–La(1)–N(7)             | 74.2(3)   |
| Se(1)#2–La(1)–N(8)    | 118.5(4)  | N(1)–La(1)–N(2)                | 63.1(5)   |
| N(1)–La(1)–N(3)       | 77.3(6)   | N(1)–La(1)–N(4)                | 137.5(6)  |
| N(1)–La(1)–N(5)       | 66.2(6)   | N(1)–La(1)–N(6)                | 117.3(5)  |
| N(1)–La(1)–N(7)       | 146.5(6)  | N(1)–La(1)–N(8)                | 125.1(5)  |
| N(2)–La(1)–N(3)       | 69.6(5)   | N(2)–La(1)–N(4)                | 109.3(5)  |
| N(2)–La(1)–N(5)       | 119.5(5)  | N(2)–La(1)–N(6)                | 178.6(5)  |
| N(2)–La(1)–N(7)       | 116.3(5)  | N(2)–La(1)–N(8)                | 62.6(5)   |
| N(3)–La(1)–N(4)       | 61.9(5)   | N(3)–La(1)–N(5)                | 69.1(6)   |
| N(3)–La(1)–N(6)       | 109.1(5)  | N(3)–La(1)–N(7)                | 135.6(5)  |
| N(3)–La(1)–N(8)       | 91.0(5)   | N(4)–La(1)–N(5)                | 87.3(6)   |
| N(4)–La(1)–N(6)       | 69.4(5)   | N(4)–La(1)–N(7)                | 75.8(5)   |
| N(4)–La(1)–N(8)       | 70.0(5)   | N(5)–La(1)–N(6)                | 60.1(5)   |
| N(5)–La(1)–N(7)       | 124.2(5)  | N(5)–La(1)–N(8)                | 155.3(6)  |
| N(6)–La(1)–N(7)       | 64.2(5)   | N(6)–La(1)–N(8)                | 117.2(5)  |
| N(7)–La(1)–N(8)       | 60.7(5)   |                                |           |

Symmetry transformations used to generate equivalent atoms: #1)  $-x, -y+1, -z+2$ ; #2)  $-x, -y+1, -z+1$ .

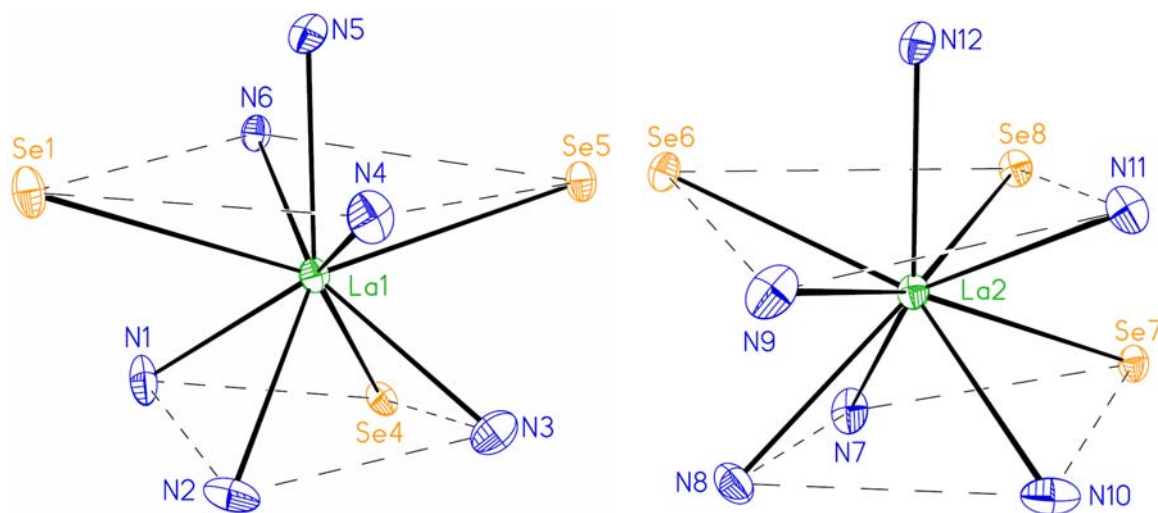

**Figure S1.** Crystal structures of La(1)N<sub>6</sub>Se<sub>3</sub> and La(2)N<sub>6</sub>Se<sub>3</sub> polyhedra in **1**.

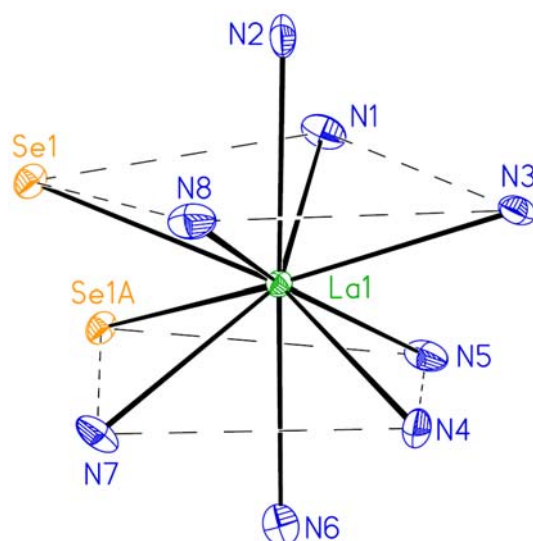

**Figure S2.** Crystal structures of LaN<sub>8</sub>Se<sub>2</sub> polyhedron in **2**.

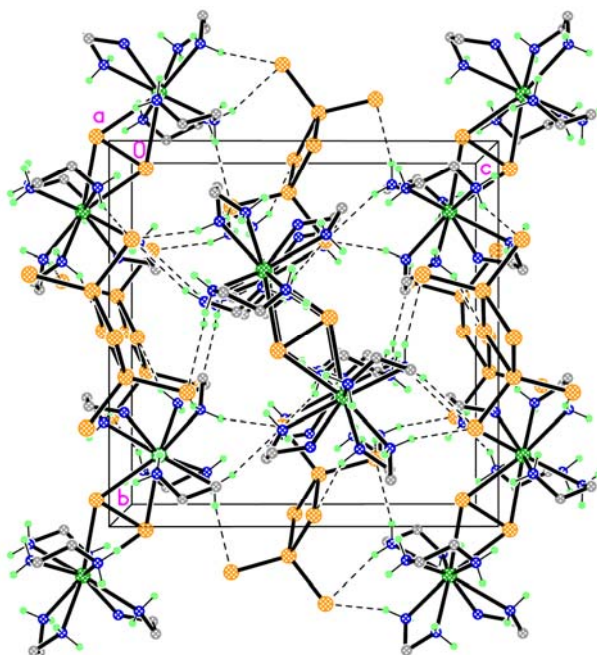

**Figure S3.** Crystal packing of **2**, showing intermolecular N–H⋯Se interactions. Hydrogen atoms of CH<sub>2</sub> are omitted for clarity.
